# Supplementary material for: Systematic tuning of segmented magnetic nanowires into three-dimensional arrays of ‘bits’
Source: Royal Society of Chemistry journal article supplement (doi:10.1039/c7ra06734h), 2017-01-01
Supplement: c7ra06734h1.pdf [file c7ra06734h1.pdf]

Electronic Supplementary Information to:

## Systematic tuning of segmented magnetic nanowires into three-dimensional arrays of 'bits'

Sebastian Bochmann,<sup>a</sup> Amalio Fernandez-Pacheco,<sup>b</sup> Andreas Neff,<sup>c</sup> Mirza Mačković,<sup>d</sup>  
Erdmann Spiecker,<sup>d</sup> Katrin R. Siefertmann,<sup>c</sup> Russell Cowburn,<sup>b</sup> Julien Bachmann<sup>a,†</sup>

<sup>a</sup> *Friedrich-Alexander University of Erlangen-Nürnberg, Inorganic Chemistry,  
Egerlandstrasse 1, 91058 Erlangen, Germany*

<sup>b</sup> *Cavendish Laboratory, University of Cambridge,  
J. J. Thomson Avenue, Cambridge CB3 0HE, UK*

<sup>c</sup> *Leibniz Institute of Surface Modification (IOM),  
Permoserstrasse 15, 04318 Leipzig, Germany*

<sup>d</sup> *Institute of Micro- and Nanostructure Research (WW9) and Center for Nanoanalysis and  
Electron Microscopy (CENEM), Cauerstr. 6, 91058 Erlangen, Germany*

<sup>†</sup> julien.bachmann@fau.de

### Contents:

**Figure S1.** Dependence of the remanence of ordered Ni<sub>x</sub>Co<sub>y</sub> wire arrays on the composition.

**Figure S2.** Quantitative SEM-EDX profile of an isolated Ni<sub>60</sub>Co<sub>40</sub> / Cu wire.

**Figure S3.** SEM micrograph of segmented NiCo / Cu wires in a large bundle.

**Figure S4.** UV-PEEM micrograph of an isolated segmented NiCo / Cu wire.

**Figure S5.** Individual TEM-EDX mappings of segmented wires.

**Figure S6.** XRD investigation into the origin of hcp-Ni<sub>60</sub>Co<sub>40</sub>.

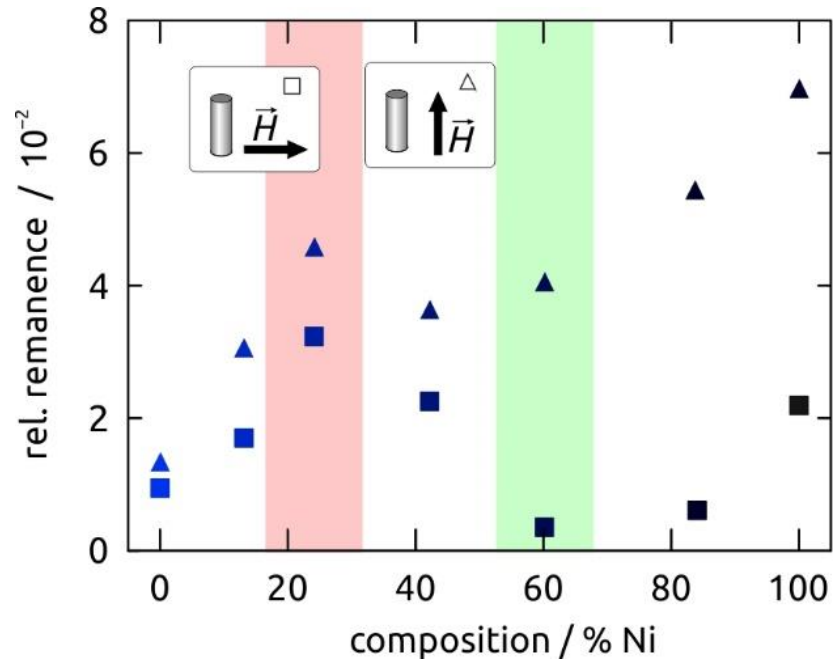

**Figure S1.** Dependence of the remanence of ordered  $\text{Ni}_x\text{Co}_y$  wire arrays on the composition, obtained from SQUID magnetometry with the wires' long axis oriented parallel to the applied field (triangles) and perpendicular to it (squares).

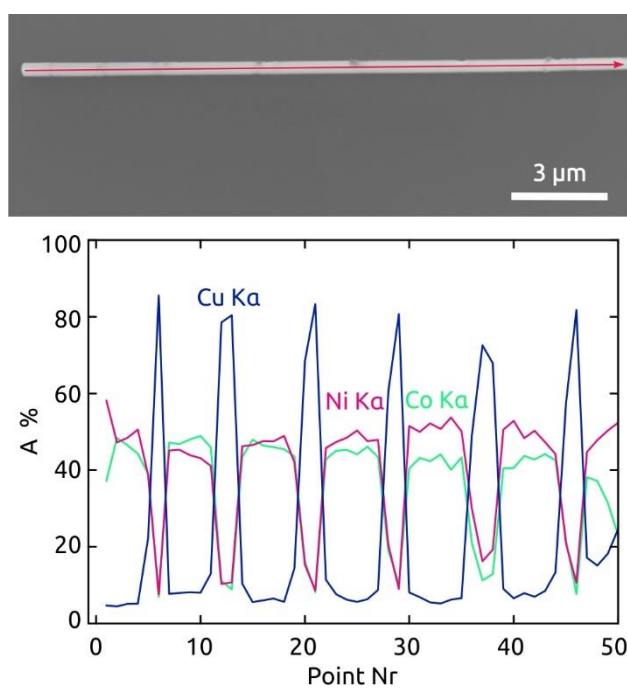

**Figure S2.** Quantitative EDX line analysis of the wire presented in **Figure 7a** of the main text.

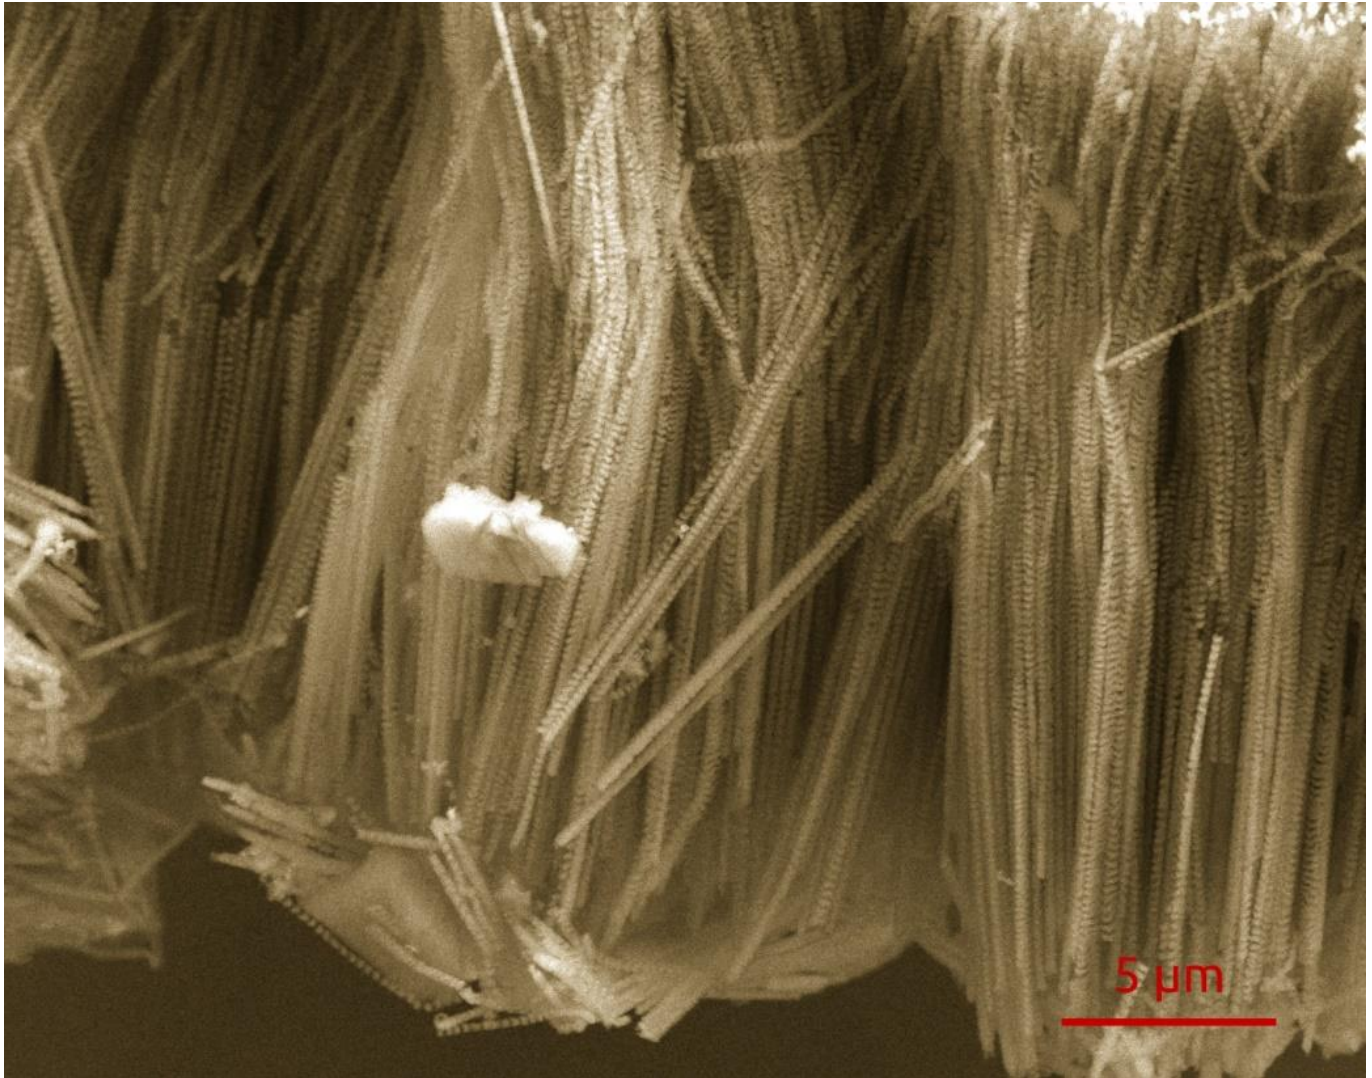

**Figure S3.** Scanning electron micrograph of segmented NiCo / Cu wires isolated from the alumina matrix by etching in potassium hydroxide.

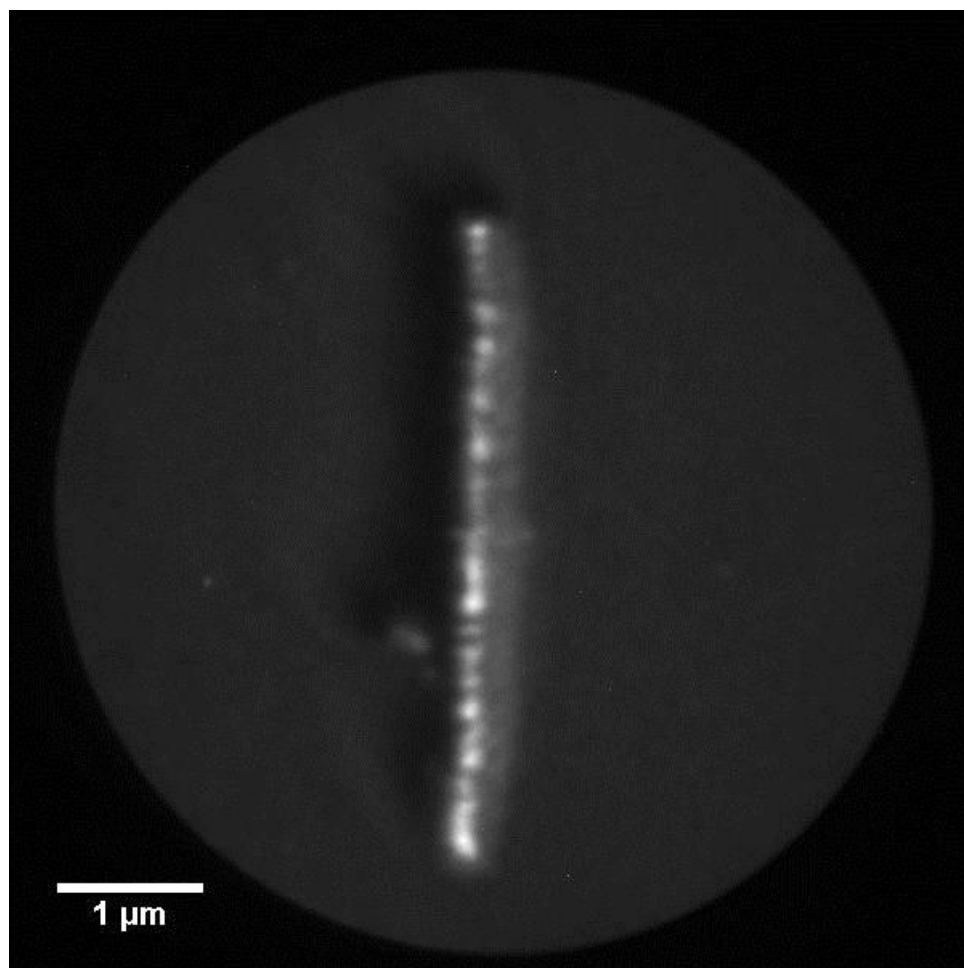

**Figure S4.** Ultraviolet photoemission electron micrograph (UV-PEEM) of an isolated NiCo / Cu wire of 200 nm diameter and with 200 nm segment length.

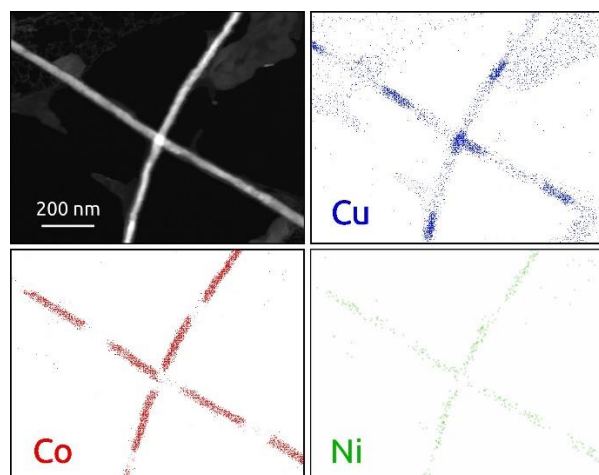

**Figure S5.** TEM-EDX analysis of two segmented NiCo / Cu wires crossed: The HAADF signal and the individual EDX signals are presented separately for each element. The color coding follows the sulfate salts...

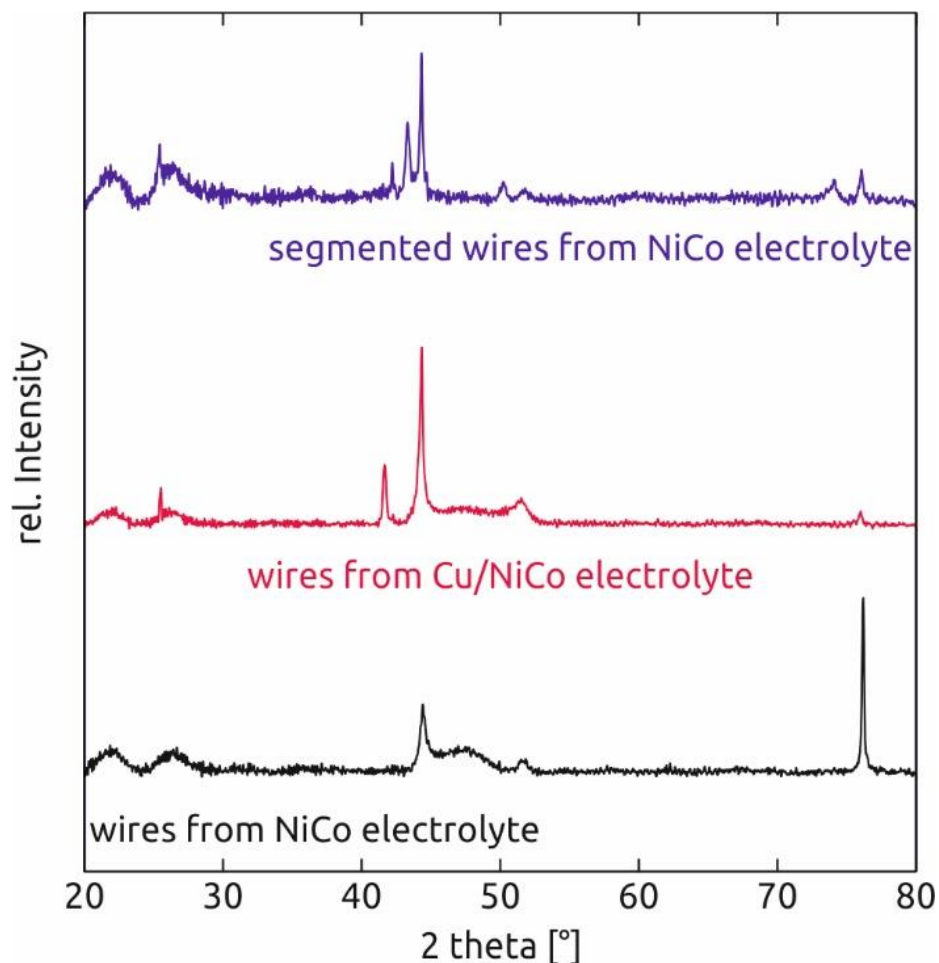

**Figure S6.** X-ray diffraction investigation of the origin of hcp-Ni<sub>60</sub>Co<sub>40</sub> in segmented Ni<sub>60</sub>Co<sub>40</sub> / Cu wires (blue line). Ni<sub>60</sub>Co<sub>40</sub> wires grown from the binary electrolyte have the fcc crystal structure (black line), but Ni<sub>60</sub>Co<sub>40</sub> wires grown from the ternary electrolyte already display the fcc peak at 41° (pink line). Thus, the mere presence of copper in the electrolyte suffices to change the crystal structure of the nickel-cobalt alloy deposited.
